# Supplementary material
Source: PubMed Central journal article supplement (PMC5334281)
Supplement: NIHMS840962-supplement-2.pdf [file NIHMS840962-supplement-2.pdf]

## Supplemental Information

### Supplemental Materials and Methods

**Cell lines and Cell Culture.** The DLD1 colon tumor cell line contains mutations in the *hMSH6* gene (44). A one bp deletion results in a termination codon at residue 222 and a second mutation results in a termination codon at 1103. This cell line is defective in mismatch repair and exhibits microsatellite instability. The DLD1 chromosome 2 transfer line restores the mismatch repair deficiency (44). HCT116 cells harbor a homozygous nonsense mutation in the *hMLH1* gene at residue 252 (45). The HCT116 chromosome 3 transfer line restores the mismatch repair deficiency (46). XP20S cells were derived from a patient with XP and harbored a homozygous mutation at the 3'-splice acceptor site of intron 3 of *hXPA* (22).

**NCI Approved Oncology Drugs Set II Screen.** Cells were plated in 384 well plates at a density of 1000 cells/well and allowed to attach overnight. The following day, cells were treated with the drugs at a final concentration of 10  $\mu$ M. After treatment times of 24 or 72 hours, cell viability was measured using CellTiter-Glo® (Promega) according to manufacturer's instructions. Cells were treated with vehicle (DMSO) or 10  $\mu$ g/ml puromycin as negative and positive controls, respectively. The percent viability was calculated:

$$100 - \left( \frac{\text{average reading negative control} - \text{sample reading}}{\text{average reading negative control} - \text{average reading positive control}} \right) * 100.$$

Dose-response curves were performed in 96 well plates with cells plated at a density of 3000 cells/well. The percent viability was calculated as described above. The differences in cell viability were confirmed by clonogenic survival assays.

**Protein Purification.** Pellets were resuspended in buffer B (40 mM TrisCl, pH 8.0, 0.5 M NaCl, 5 mM imidazole) supplemented with 1 mM phenylmethanesulfonyl fluoride solution (PMSF) (Sigma-Aldrich) and complete EDTA-free protease inhibitor cocktail tablet (Roche) and lysed via sonication. The lysate was cleared by centrifugation and applied to a 5 ml HiTrap Chelating HP column (GE Healthcare) charged with NiSO<sub>4</sub> using a linear imidazole gradient (from 5 to 500 mM) in buffer B. Pol  $\beta$  was eluted at about 275 mM imidazole. The fractions were combined, concentrated to about 1 ml and diluted to 10 ml in buffer D (50 mM Tris-HCl pH 8.0, 1 mM EDTA, 10% glycerol, 100 mM NaCl). The diluted protein applied to a HiTrap SP HP column (GE Healthcare) using a linear NaCl gradient from 100 mM to 2000 mM. Purified protein fractions eluted at approximately 1000-1200 mM NaCl. The protein was concentrated, glycerol was added to a final concentration of 15%, and aliquots were flash frozen in liquid nitrogen and

stored at  $-80^{\circ}\text{C}$ . Final protein concentration was determined using the absorbance at 280 nm and the extinction coefficient for Pol  $\beta$  ( $21200\text{ M}^{-1}\text{ cm}^{-1}$ ).

**Preparation of DNA Substrates.** The template strand of DNA was platinated on the two guanines by incubating  $250\ \mu\text{M}$  template DNA with  $350\ \mu\text{M}$  cisplatin (water was used in mock reaction) in buffer P ( $1\ \text{mM Na}_2\text{PO}_4$ , pH 7.4,  $3\ \text{mM NaCl}$ ) overnight at  $37^{\circ}\text{C}$ . Platinated and mock template DNA was purified by PAGE. The platinated DNA migrated slower and was able to be distinguished from the mock DNA. The primer oligo was radiolabelled with  $\gamma\text{-}^{32}\text{P}$  ATP using T4 polynucleotide kinase (New England Biolabs) and were purified using Microspin columns (Biorad). Primer and template oligos were annealed by denaturing at  $95^{\circ}\text{C}$  for 5 minutes, slow cooling to  $50^{\circ}\text{C}$  for 30 minutes, holding at  $50^{\circ}\text{C}$  for 20 minutes, and then resting on ice. Complete substrate annealing was confirmed using 12% native PAGE and visualized using autoradiography.

### Supplemental Figure Legends

**Figure S1. Dose-response curve of MCF7 cells.** MCF7 cells were plated at a density of 3,000 cells/well in a 96 well plate. Cells were treated with various concentrations of cisplatin ( $0\text{-}25\ \mu\text{M}$ ) and cell viability was measured after 24 h using CellTiter-Glo®. Data are presented as mean  $\pm$  SEM of the percent viability ( $n=6$ ).

**Figure S2. Western blotting analysis of Pol  $\beta$  in cell lines.** Representative western blots show expression of exogenous HA-tagged WT P242R, and E295K Pol  $\beta$ . The specific cell lines are shown above the blot. Endogenous Pol  $\beta$  was used as a loading control. The ratio of exogenous HA-tagged Pol  $\beta$  to endogenous Pol  $\beta$  was quantified and is depicted below the blots.

**Figure S3. Pol  $\beta$  and XPA interact *in vitro*.** Pulldown using whole cell extract from Pol  $\beta^{-/-}$  MEFs and his-tagged purified Pol  $\beta$  proteins. Lane 1: WT Pol  $\beta$  protein; Lane 2: P242R Pol  $\beta$  protein; Lane 3: no protein; Lane 4: 25% input.

**Figure S4. The effect of E295K Pol  $\beta$  expression on survival following cisplatin treatment.**

A. A549 cells expressing WT, P242R, or E295K Pol  $\beta$  or containing empty vector were treated with varying concentrations of cisplatin ( $0\text{-}12.5\ \mu\text{M}$ ). Clonogenic survival assays were performed, and data are presented as mean  $\pm$  SEM of the percent survival ( $n = 3\text{-}6$ ). B. A549 cells expressing WT, P242R, E295K, the P242R/E295K double mutant Pol  $\beta$  or containing empty vector were treated with varying concentrations of cisplatin ( $0\text{-}6.25\ \mu\text{M}$ ). Clonogenic

survival assays were performed, and data are presented as mean  $\pm$  SEM of the percent survival (n = 3). C. DLD1 cells deficient in MSH6 (-MSH6; open bars) or complemented with MSH6 (+MSH6; filled bars) were treated with 6.25  $\mu$ M cisplatin and allowed to recover for 0 and 96 h. Apoptotic cells were measured by staining with Annexin V antibody. Data are presented as the ratio of apoptotic cells in cisplatin-treated cells vs untreated cells for each cell line. WT and P242R data also shown in Figure 5D.

### Supplemental Tables

**Table S1. Difference in viability of crosslinking agents from high-throughput screen.**

| <b>Drug Name</b> | <b>Difference in viability at 24 h (WT-P242R)<sup>a</sup></b> | <b>Difference in viability at 72 h (WT-P242R)<sup>a</sup></b> |
|------------------|---------------------------------------------------------------|---------------------------------------------------------------|
| cisplatin        | -31.3                                                         | -14.4                                                         |
| carboplatin      | -23.9                                                         | -26                                                           |
| oxaliplatin      | -2.5                                                          | -10.7                                                         |
| mitomycin C      | 11.6                                                          | 1.7                                                           |
| cyclophosphamide | 3.1                                                           | 7.4                                                           |

<sup>a</sup> The difference in viability was determined by subtracting the viability of P242R-expressing cells from WT-expressing cells for the individual drugs. Positive numbers and negative numbers indicate the drugs where P242R-expressing cells were more sensitive or resistant to, respectively, compared to WT-expressing cells.
