# Supplementary material
Source: PubMed Central journal article supplement (PMC5334281)

Figure S1

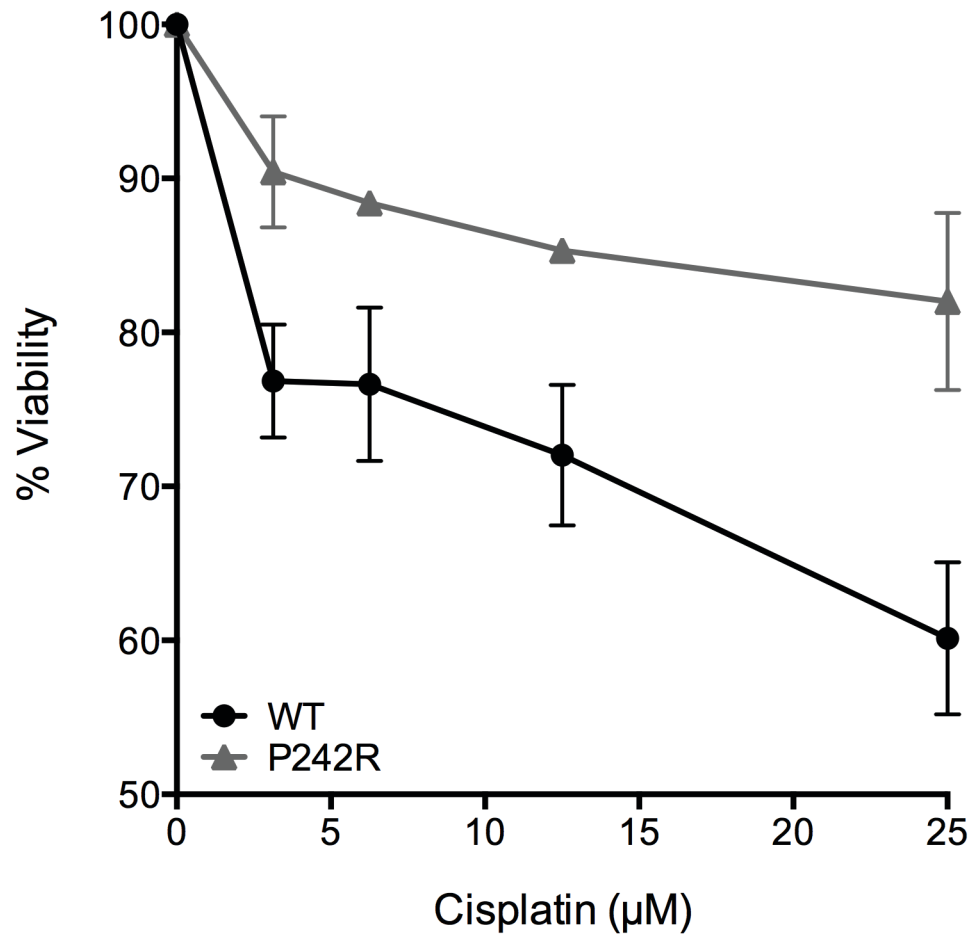

Figure S2

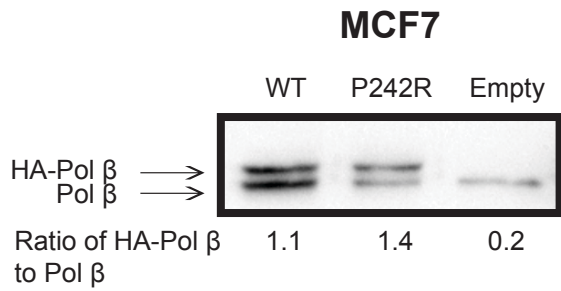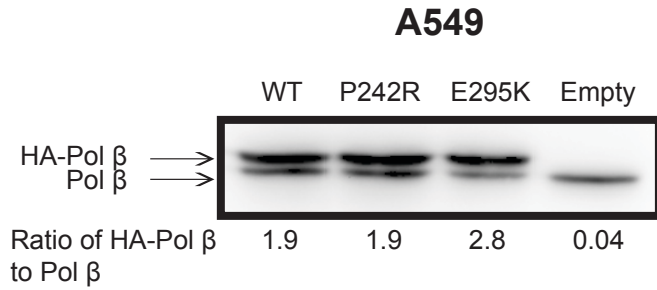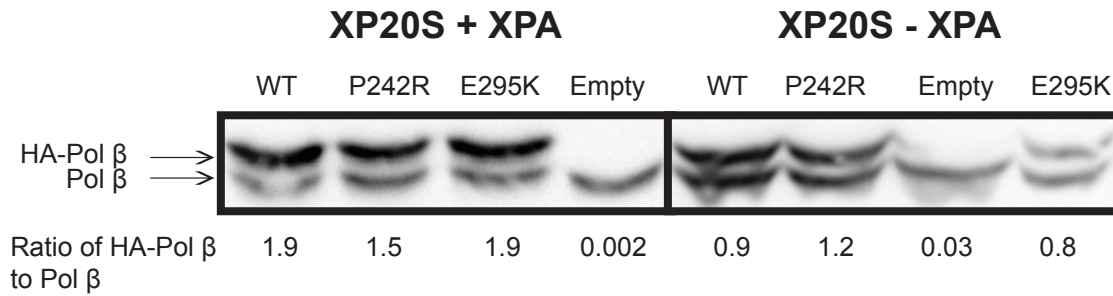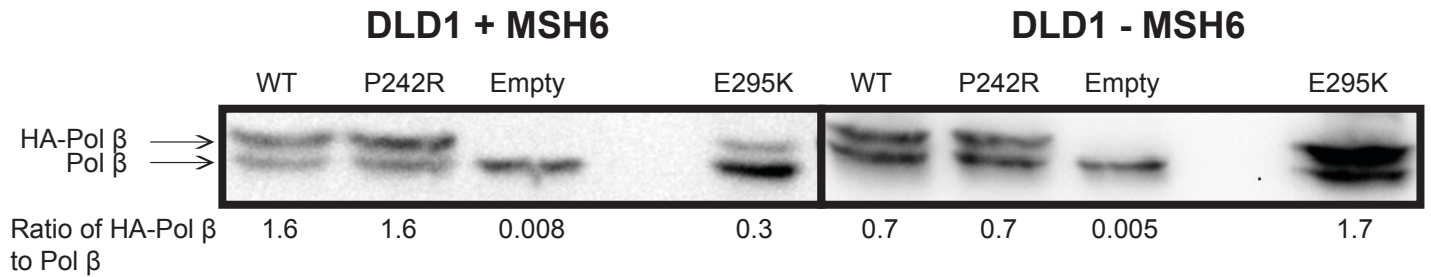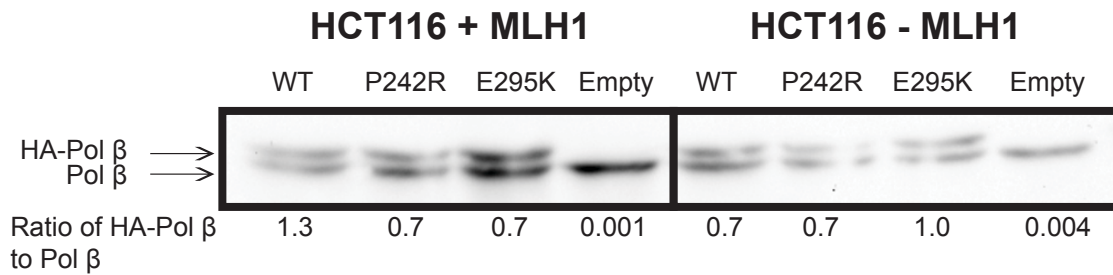

Figure S3

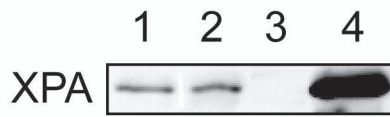

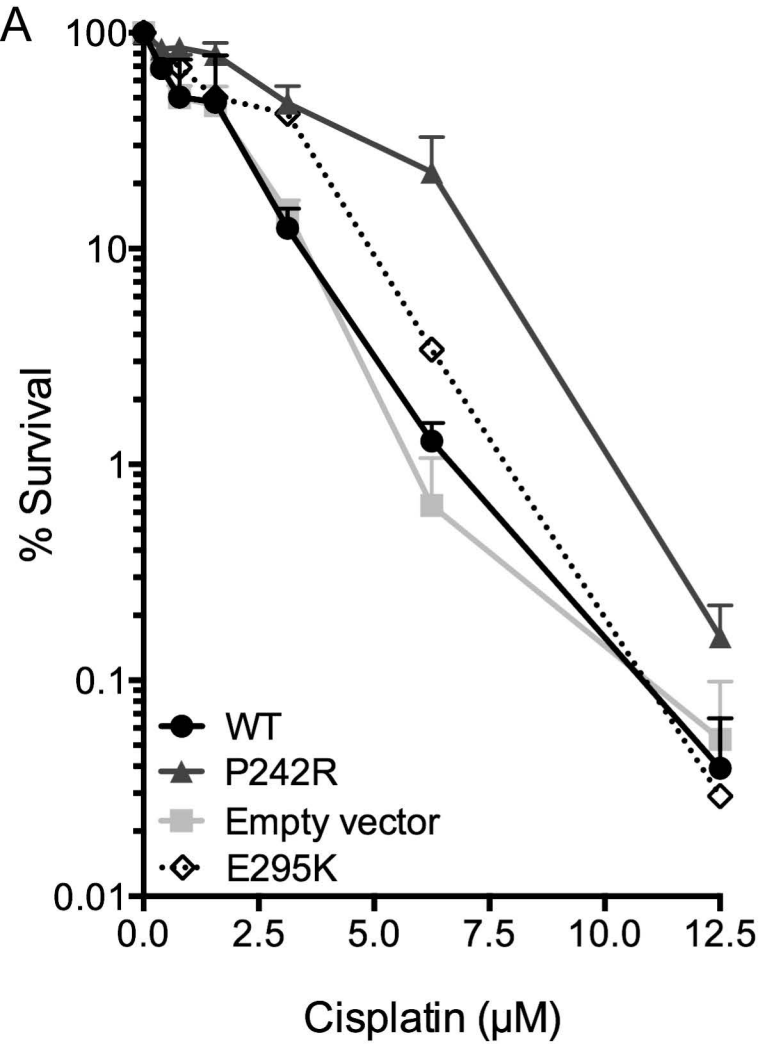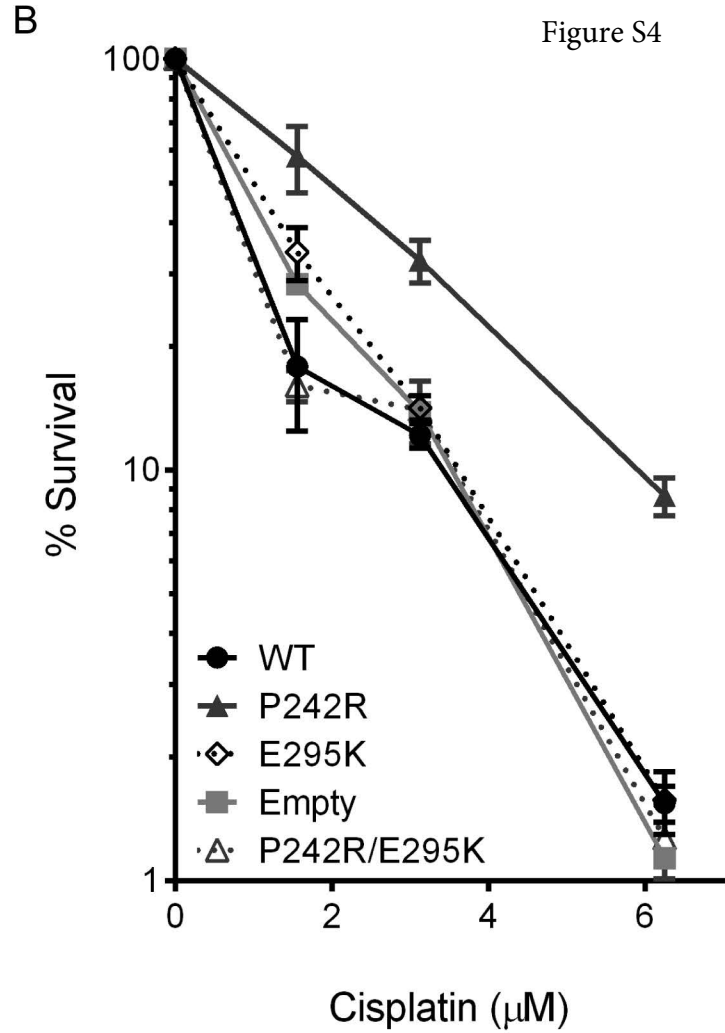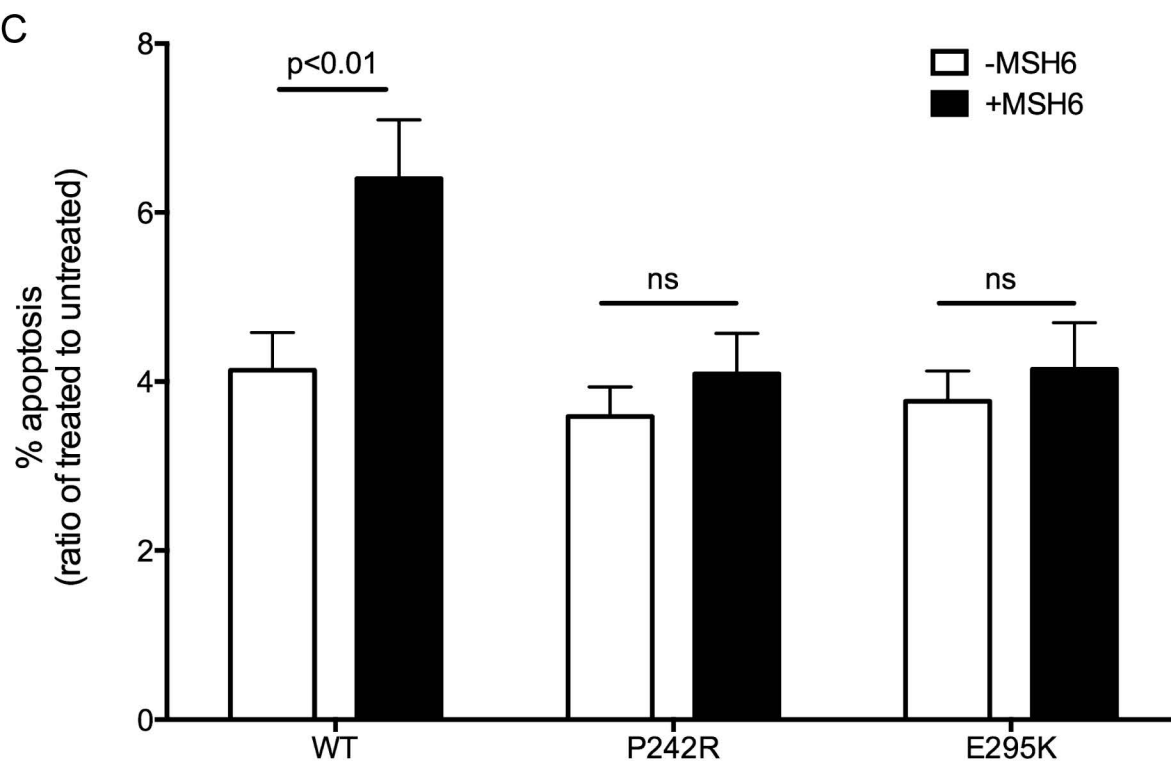

Supplement: NIHMS840962-supplement-1.pdf [file NIHMS840962-supplement-1.pdf]
